# Supplementary material
Source: Springer Nature journal article supplement (https://www.springermedizin.de/resource/supplementary/12936_2013_3093_MOESM1_ESM.pdf/9545724)
Supplement: MOESM1 [file 9545724]

**787 treatments for malaria  
Oct 2011 – December 2012**

**3 treatments for  
complicated malaria**

**14 treatments for non-  
falciparum malaria**

**770 treatments for uncomplicated malaria  
with *P. falciparum***

**416 treatments with AL  
(96 children)**

**354 treatments with DP  
(106 children)**

**18 Day 1 blood smear  
results missing**

**7 Day 1 blood smear  
results missing**

**398 with blood smear  
results on Day 1**

**347 with blood smear  
results on Day 1**

**4 Day 2 blood smear  
results missing**

**2 Day 2 blood smear  
results missing**

**412 with blood smear  
results on Day 2**

**352 with blood smear  
results on Day 2**

**8 Day 3 blood smear  
results missing**

**10 Day 3 blood smear  
results missing**

**408 with blood smear  
results on Day 3**

**344 with blood smear  
results on Day 3**
